# Supplementary material
Source: MDPI journal article supplement (https://www.mdpi.com/2077-0472/12/8/1167)
Supplement: s1 [file s1]

## Supplementary Materials

### Effects of Combined Main Ditch and Field Ditch Control Measures on Crop Yield and Drainage Discharge in the Northern Huaihe River Plain, Anhui Province, China

Rong Tang <sup>1</sup>, Xiugui Wang <sup>1,\*</sup>, Xudong Han <sup>1,\*</sup>, Yihui Yan <sup>1</sup>, Shuang Huang <sup>1</sup>, Jiesheng Huang <sup>1</sup>, Tao Shen <sup>2</sup>, Youzhen Wang <sup>2</sup> and Jia Liu <sup>2</sup>

<sup>1</sup> State Key Laboratory of Water Resources and Hydropower Engineering Science, Wuhan University, Wuhan 430072, China; rongtang@whu.edu.cn (R.T.); hanxudong@whu.edu.cn (X.H.); yanyihui@whu.edu.cn (Y.Y.); hsh5527@whu.edu.cn (S.H.); sdjshuang@whu.edu.cn (J.H.)

<sup>2</sup> Key Laboratory of Water Conservancy and Water Resources of Anhui Province, Anhui & Huaihe River Institute of Hydraulic Research, Bengbu 233000, China; shentao97@163.com (T.S.); skywyz@126.com (Y.W.); liujia12345654321@163.com (J.L.)

\* Correspondence: wangxg@whu.edu.cn (X.W.); hanxudong@whu.edu.cn (X.H.); Tel.: +86-153-3723-6043 (X.W.); +86-150-7100-2290 (X.H.)

**Number of pages = 6**

**Number of texts = 1**

**Number of figures = 1**

**Number of tables = 7**

The coefficient of determination ( $R^2$ ), standardized root mean square error ( $NRMSE$ ), root mean square error ( $RMSE$ ), and the relative error ( $RE$ ) were selected as indexes to evaluate the simulation results. The evaluation criteria of these indexes for model simulation are shown in Equations (S1–S4) (Inam et al., 2017):

$$R^2 = \frac{\left[ \sum_{u=1}^n (m_u - m)(s_u - s) \right]^2}{\sum_{u=1}^n (m_u - m)^2 \sum_{u=1}^n (s_u - s)^2} \quad (S1)$$

$$NRMSE = \sqrt{\frac{\sum_{u=1}^n (m_u - s_u)^2}{n}} \times \frac{100}{m} \quad (S2)$$

$$RMSE = \sqrt{\frac{\sum_{u=1}^n (m_u - s_u)^2}{n}} \quad (S3)$$

$$RE = \frac{\sum_{u=1}^n m_u}{\sum_{u=1}^n s_u} - 1 \quad (S4)$$

where  $s_u$  and  $m_u$  denote the simulated and measured values of the  $u$ -th sample, respectively;  $m$  and  $s$  denote the mean value; and  $n$  denotes the number of measured values. In general, the model simulation can be judged as excellent with a  $NRMSE$  of less than 0.25, within the acceptable range, if the  $NRMSE$  is greater than 0.25 and less than 0.3 (Xue and Ren, 2017). An  $RE$  less than 0.2 is generally satisfactory (Chen et al., 2014). The  $RMSE$  is as small as possible, and any  $R^2$  greater than 0.65 is acceptable (Moriassi et al., 1983).

## References

- Chen, Z., Liu, X., Zhu, B., 2014. Runoff estimation in hillslope cropland of purple soil based on SCS-CN model. *Nongye Gongcheng Xuebao/Transactions of the Chinese Society of Agricultural Engineering* 30, 72–81. <https://doi.org/10.3969/j.issn.1002-6819.2014.07.009>
- Inam, A., Adamowski, J., Prasher, S., & Albano, R. (2017). Parameter estimation and uncertainty analysis of the Spatial Agro Hydro Salinity Model (SAHYSMOD) in the semi-arid climate of Rechna Doab, Pakistan. *Environmental Modelling and Software*, 94, 186–211. <https://doi.org/10.1016/j.envsoft.2017.04.002>
- Moriassi, D.N., Arnold, J.G., Liew, M.W. van, Bingner, R.L., Harmel, R.D., Veith, T.L., 1983. MODEL EVALUATION GUIDELINES FOR SYSTEMATIC QUANTIFICATION OF ACCURACY IN WATERSHED SIMULATIONS, Transactions of the ASABE.
- Xue, J., Ren, L., 2017. Conjunctive use of saline and non-saline water in an irrigation district of the Yellow River Basin. *Irrigation and Drainage* 66, 147–162. <https://doi.org/10.1002/ird.2102>

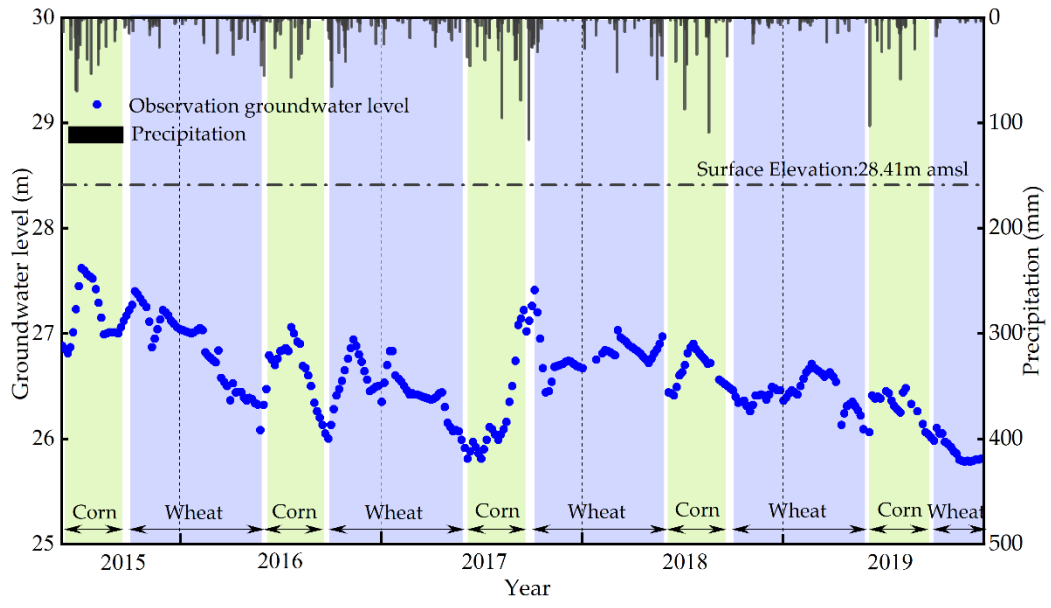

(a)M2

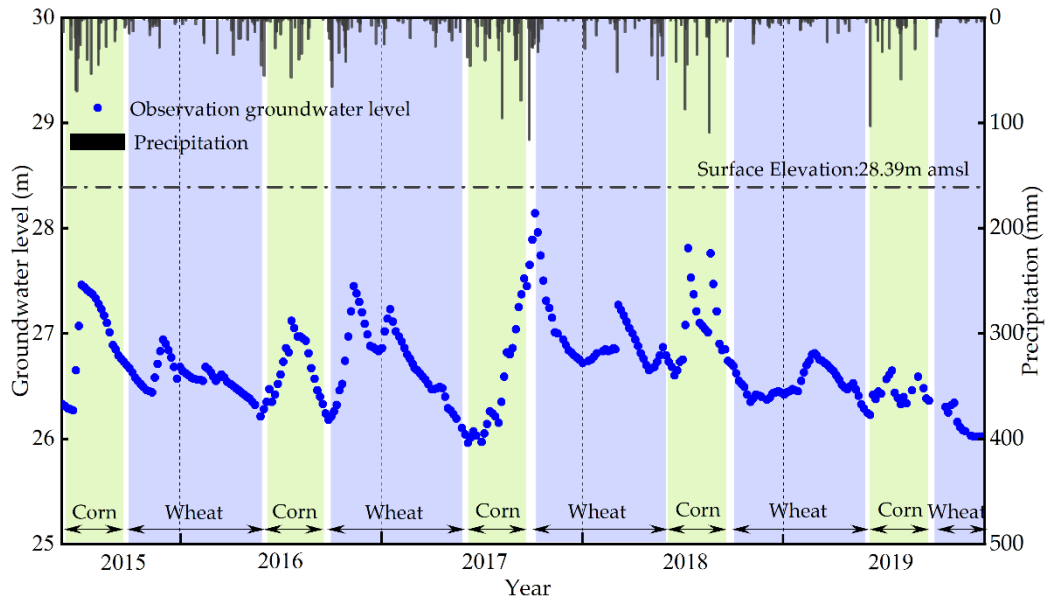

(b)M5

**Figure S1.** The rainfall and observed groundwater level change process of the representative field near the Chezhe ditch M2 (a) and far from the Chezhe ditch M5 (b) from 2015 to 2019.

**Table S1. Main parameters of surface runoff generation module**

| Landuse   | CN2A | CN2B | CN2C | CN2D |
|-----------|------|------|------|------|
| Building  | 77   | 86   | 91   | 94   |
| Grassland | 49   | 69   | 79   | 84   |
| Forest    | 45   | 66   | 77   | 83   |
| Crop      | 62   | 73   | 81   | 84   |
| Bare land | 45   | 66   | 77   | 83   |
| Water     | 92   | 92   | 92   | 92   |

Note: A (Low runoff potential), B (The soils have a moderate infiltration rate when thoroughly wetted.), C (The soils have a slow infiltration rate when thoroughly wetted.) and D (High runoff potential) were soil permeability conditions, CN2 is the moisture condition II curve number.

**Table S2. Main parameters of ditch confluence module**

| Main ditch       | Permeability coefficient ( $k$ , m/d) | Roughness ( $n$ ) |
|------------------|---------------------------------------|-------------------|
| Xihongsi ditch   | 0.1                                   | 0.1               |
| Chezhe ditch     | 0.2–0.4                               | 0.013             |
| Zhuma ditch      | 0.1–0.4                               | 0.013             |
| Zhonghongsiditch | 0.4                                   | 0.013             |
| Donghongsiditch  | 0.4                                   | 0.013             |

**Table S3. Main parameters of soil water and groundwater module**

| Depth(m)                                   | 0–0.2 | 0.2–0.4 | 0.4–0.8 | 0.8–6 | 6–35  |
|--------------------------------------------|-------|---------|---------|-------|-------|
| $\theta_r$ ( $\text{cm}^3\text{cm}^{-3}$ ) | 0.01  | 0.02    | 0.01    | 0.01  | 0.01  |
| $\theta_s$ ( $\text{cm}^3\text{cm}^{-3}$ ) | 0.37  | 0.4     | 0.38    | 0.38  | 0.38  |
| $\alpha$ ( $\text{cm}^{-1}$ )              | 0.011 | 0.011   | 0.006   | 0.003 | 0.003 |
| $n$ (–)                                    | 1.58  | 1.45    | 1.15    | 1.1   | 1.1   |
| $K_s$ ( m/d )                              | 2.5   | 8       | 10      | 15    | 15    |
| $l$ (–)                                    | 0.5   | 0.5     | 0.5     | 0.5   | 0.5   |
| Specific yield                             | 0.05  | 0.05    | 0.05    | 0.1   | 0.1   |

**Table S4. Main parameters of crop growth module**

| Parameters                                                          | Corn | Wheat |
|---------------------------------------------------------------------|------|-------|
| Max root depth (m)                                                  | 2    | 1.3   |
| Potential harvest index (–)                                         | 0.5  | 0.47  |
| Optimal temperature for crop (°C)                                   | 25   | 18    |
| Radiation use efficiency (kg hm <sup>-2</sup> /MJ m <sup>-2</sup> ) | 39   | 30    |
| Base temperature (°C)                                               | 8    | 0     |
| Max potential LAI (–)                                               | 6    | 4     |
| Crop growing degree fraction since leaf area decline (–)            | 0.7  | 0.5   |
| Light extinction coefficient (–)                                    | 0.65 | 0.65  |
| Biomass die-off fraction (–)                                        | 0.1  | 0.1   |
| WAVP (–)                                                            | 7.2  | 6     |

**Table S5. Comparison of observed and simulated crop yields (kg/ha)**

| Crop | Corn            |                | Wheat           |                |
|------|-----------------|----------------|-----------------|----------------|
| Year | simulated value | Observed value | simulated value | Observed value |
| 2017 | 8639.2          | —              | 7595.9          | 7685           |
| 2018 | 8608.9          | —              | 7115.5          | 6977           |
| 2019 | 9147.7          | 9173.6         | 7281.1          | 7321           |
| 2020 | 7738.6          | 7592.3         | 7388.5          | 7400           |
| 2021 | —               | 7564.9         | 7303.9          | 7609.8         |

Note: "—" indicates that data is missing.

**Table S6. The crop yield and regional drainage discharge (Q) under the single-factor main ditch water depth control schemes were better than the current situation**

| Crop  | Scenario number corresponding to<br>crop yield superior to current<br>situation | Scenario number corresponding to<br>Q superior to current situation |
|-------|---------------------------------------------------------------------------------|---------------------------------------------------------------------|
| Corn  | 5,6,9,10,12,13,14,15,16                                                         | 4,5,9,12,14                                                         |
| Wheat | 5,9,11,12,14                                                                    |                                                                     |

**Note: Corresponding to the scenario number in Table S6**

**Table S7. The crop yield and regional drainage discharge (Q) under the single-factor field ditch control schemes were better than the current situation**

| Crop  | Scenario number corresponding to crop<br>yield superior to current situation | Scenario number corresponding to<br>Q superior to current situation |
|-------|------------------------------------------------------------------------------|---------------------------------------------------------------------|
| Corn  | 10,14,16,17,19,22,23,25,26                                                   | 1,2,3,4,5,6,8,10,11,12,14,                                          |
| Wheat | 11,16,17                                                                     | 15,17,18,20,21,23,24,26,27                                          |

**Note: Corresponding to the scenario number in Table S7.**
